# Supplementary material
Source: Springer Nature journal article supplement (https://www.springermedizin.de/resource/supplementary/12890_2011_327_MOESM1_ESM.pdf/9504928)
Supplement: MOESM1 [file 9504928]

## A. Risk score on admission

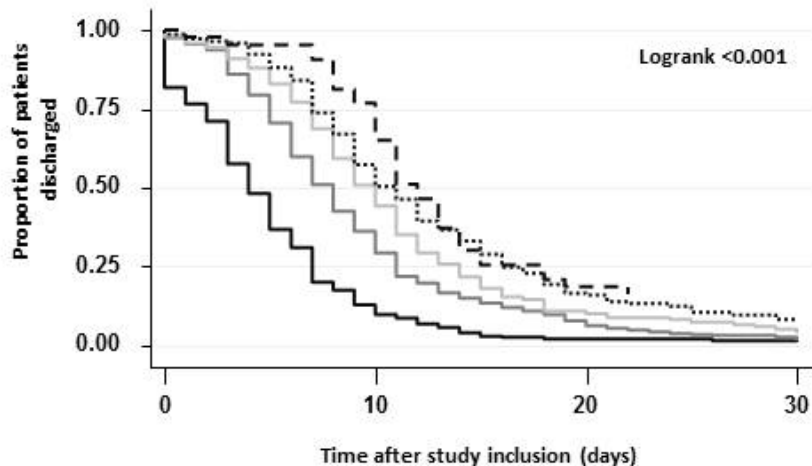

### Number at risk

|              |     |     |    |    |       |
|--------------|-----|-----|----|----|-------|
| <5 points    | 193 | 25  | 4  | 3  | —     |
| 5-9 points   | 271 | 98  | 21 | 7  | —     |
| 10-12 points | 223 | 113 | 24 | 11 | —     |
| 13-15 points | 145 | 83  | 24 | 12 | ..... |
| >15 points   | 43  | 33  | 8  | 7  | - - - |

## B. Follow-up risk score

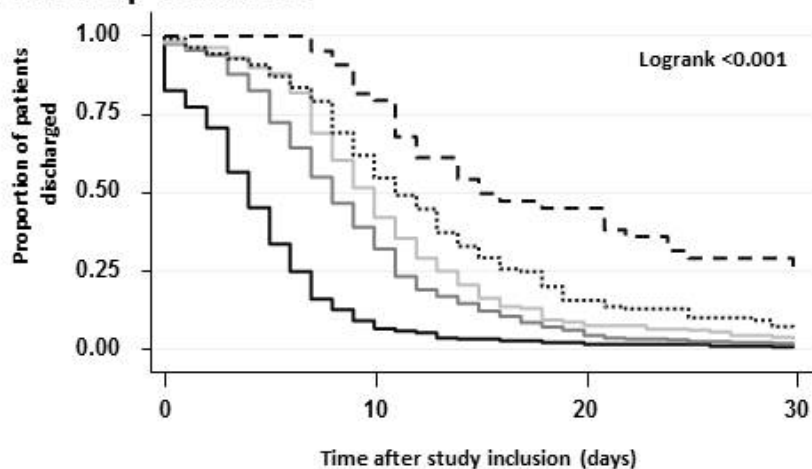

### Number at risk

|              |     |     |    |    |       |
|--------------|-----|-----|----|----|-------|
| <5 points    | 203 | 19  | 5  | 2  | —     |
| 5-9 points   | 316 | 124 | 20 | 7  | —     |
| 10-12 points | 201 | 104 | 18 | 9  | —     |
| 13-15 points | 111 | 69  | 18 | 9  | ..... |
| >15 points   | 44  | 36  | 20 | 13 | - - - |
